# Supplementary material for: Schwann cell TRPA1 mediates neuroinflammation that sustains macrophage-dependent neuropathic pain in mice
Source: PubMed Central journal article supplement (PMC5709495; doi:10.1038/s41467-017-01739-2), 2017-12-01
Supplement: 41467_2017_1739_MOESM1_ESM.pdf [file 41467_2017_1739_MOESM1_ESM.pdf]

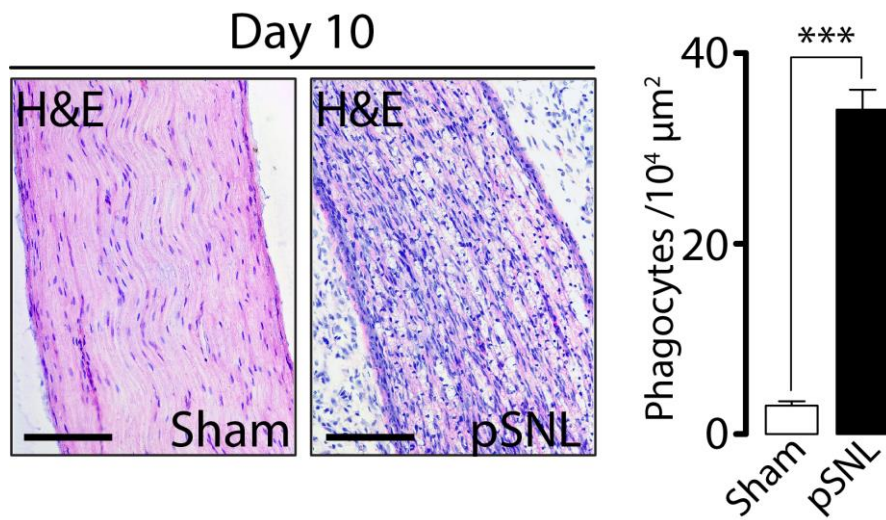

**Supplementary Figure 1. Phagocytes within the injured nerve at day 10 after pSNL.**

Representative images of hematoxylin and eosin and number of phagocytes in the sciatic nerve trunk induced by pSNL in C57BL/6 compared to sham mice. (n=4, \*\*\*P <0.001 pSNL vs. Sham; unpaired two-tailed Student's t-test). Data are represented as mean±s.e.m.

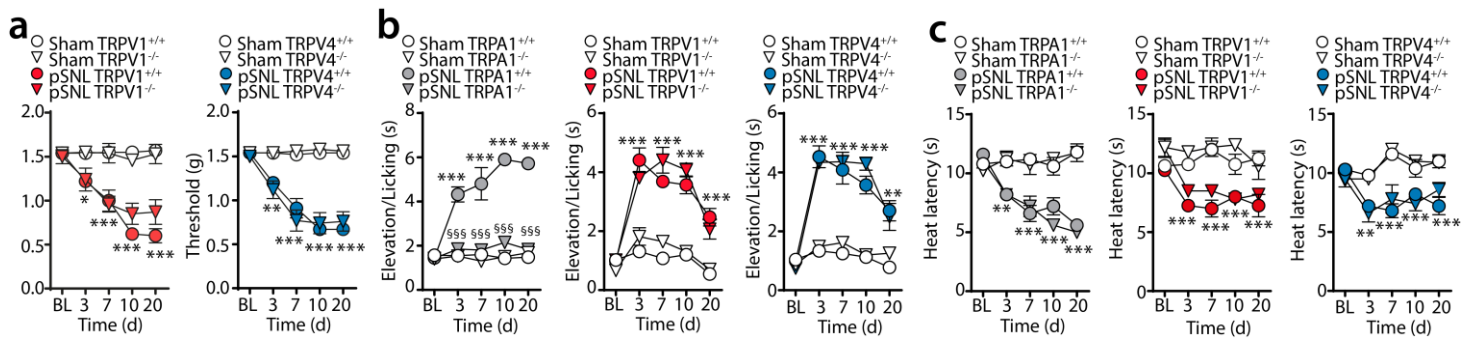

**Supplementary Figure 2. TRPA1, but not TRPV1 and TRPV4, mediates pSNL-evoked mechanical and cold allodynia, while heat hyperalgesia is not mediated by that channel. (a) Mechanical, (b) cold and (c) heat hypersensitivity in sham/pSNL *Trpv1<sup>+/+</sup>/Trpv1<sup>-/-</sup>*, *Trpv4<sup>+/+</sup>/Trpv4<sup>-/-</sup>* and *Trpa1<sup>+/+</sup>/Trpa1<sup>-/-</sup>* mice (n=6, \*\*\*P <0.001 pSNL<sup>+/+</sup> vs. Sham<sup>+/+</sup>; §§§P<0.001 pSNL<sup>+/+</sup> vs. pSNL<sup>-/-</sup>; two-way ANOVA followed by Bonferroni post hoc analyses). Data are represented as mean±s.e.m.**

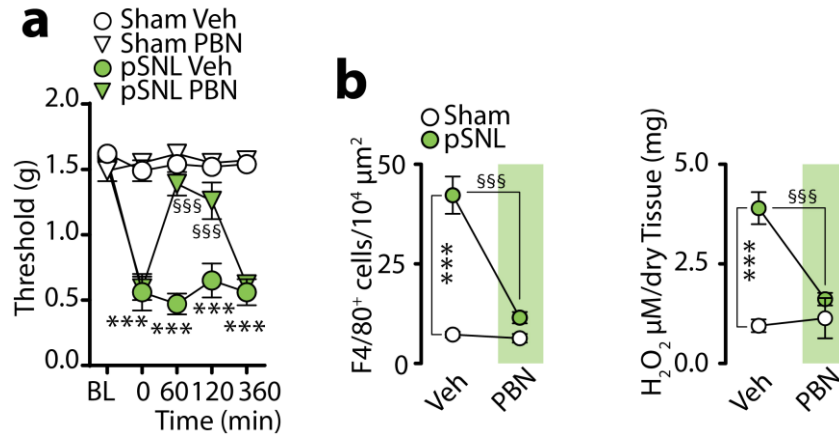

**Supplementary Figure 3. Oxidative stress mediates pSNL-evoked allodynia and neuroinflammation.** (a) Mechanical allodynia, and (b) number of F4/80<sup>+</sup> cells and H<sub>2</sub>O<sub>2</sub> content in the sciatic nerve of sham/pSNL C57BL/6 mice after phenyl-N-tert-butyl nitron (PBN, 100 mg/kg, i.p.) or vehicle (veh, isotonic saline) (n=6, \*\*\*P<0.001 pSNL veh vs. Sham veh; §§§P<0.001 pSNL PBN vs. pSNL veh; two-way ANOVA followed by Bonferroni post hoc analyses and one-way ANOVA followed by Bonferroni post hoc analyses). Data are represented as mean±s.e.m.

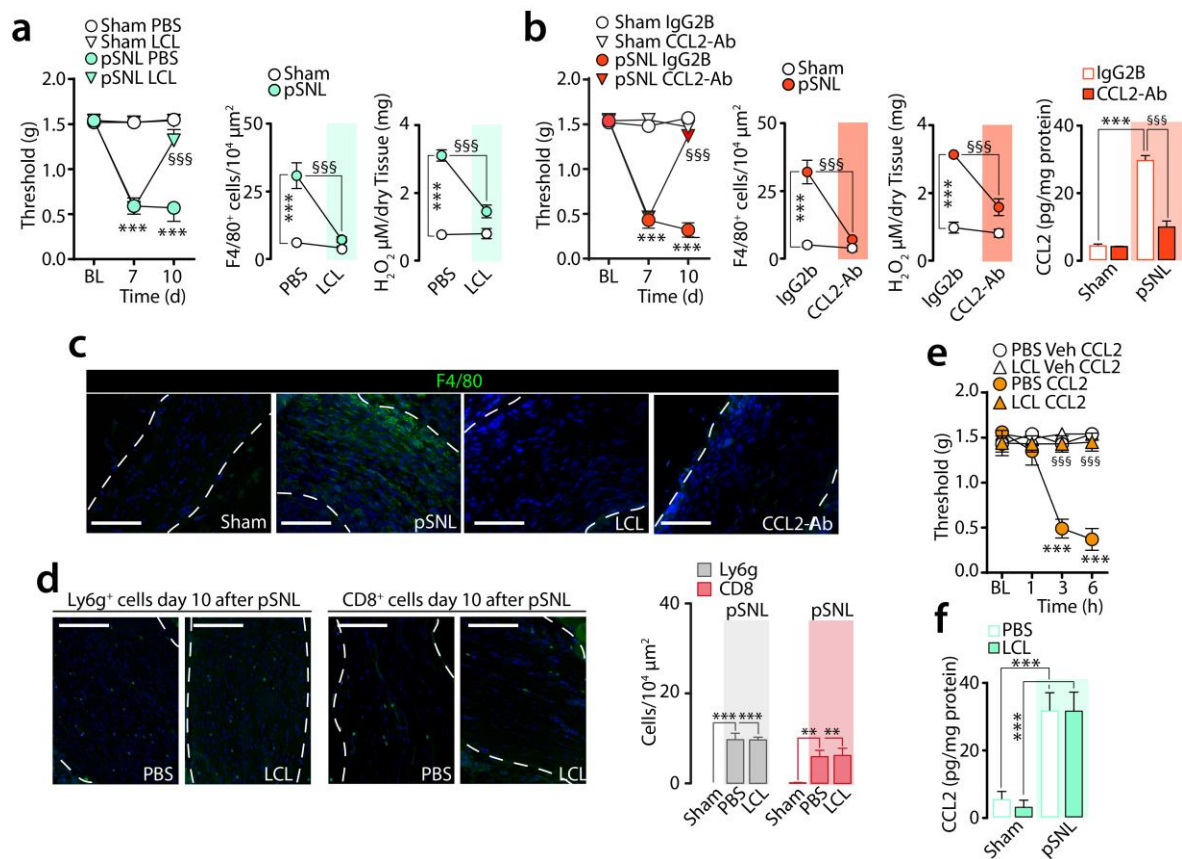

**Supplementary Figure 4. Macrophage recruitment drives pSNL-evoked allodynia and neuroinflammation.** (a) Mechanical allodynia, number of F4/80<sup>+</sup> cells and H<sub>2</sub>O<sub>2</sub> content in the sciatic nerve of sham/pSNL C57BL/6 mice after liposome-encapsulated clodronate (LCL) or its vehicle (PBS) one injection/day (5 mg/ml, i.p.) starting from day 7 after surgery until day 10 (n=5, \*\*\*P<0.001 pSNL PBS vs. Sham PBS; §§§P<0.001 pSNL LCL vs. pSNL PBS; two-way and one-way ANOVA). (b) Mechanical allodynia, number of F4/80<sup>+</sup> cells, H<sub>2</sub>O<sub>2</sub> content and CCL2 levels in the sciatic nerve of sham/pSNL C57BL/6 mice after one injection/day (40 μg/200 μl, i.p., from day 7 until day 10 after surgery) of CCL2-Ab or its vehicle (IgG2B) (n=5, \*\*\*P<0.001 pSNL IgG2B vs. Sham IgG2B; §§§P<0.001 pSNL CCL2-Ab vs. pSNL IgG2B; one-way and two-way ANOVA). (c) Representative images of F4/80<sup>+</sup> cells in the sciatic nerve of sham/pSNL C57BL/6 mice after LCL and CCL2-Ab (Scale bars: 50 μm, dashed lines indicate *perineurium*). (d) Representative images and number of Ly6g<sup>+</sup> and CD8<sup>+</sup> cells in the sciatic nerve of

sham/pSNL C57BL/6 mice after LCL (Scale bars: 50  $\mu\text{m}$ , dashed lines indicate *perineurium*). (e) Mechanical allodynia induced by perineural CCL2 (1  $\mu\text{g}$ ) in C57BL/6 mice after LCL or its vehicle (PBS) (n=5, \*\*\*P<0.001 PBS CCL2 vs. Sham PBS Veh CCL2; §§§P<0.001 LCL CCL2 vs. PBS CCL2; followed by Bonferroni post hoc analyses). Data are represented as mean $\pm$ s.e.m.). (f) CCL2 levels in sciatic nerves of sham/pSNL C57BL/6 mice at day 10 after LCL or its vehicle (PBS) (n=4, \*\*\*P<0.001 pSNL-PBS vs. sham-PBS and pSNL-LCL vs. sham-LCL; one-way ANOVA followed by Bonferroni post hoc analyses). Data are represented as mean $\pm$ s.e.m.

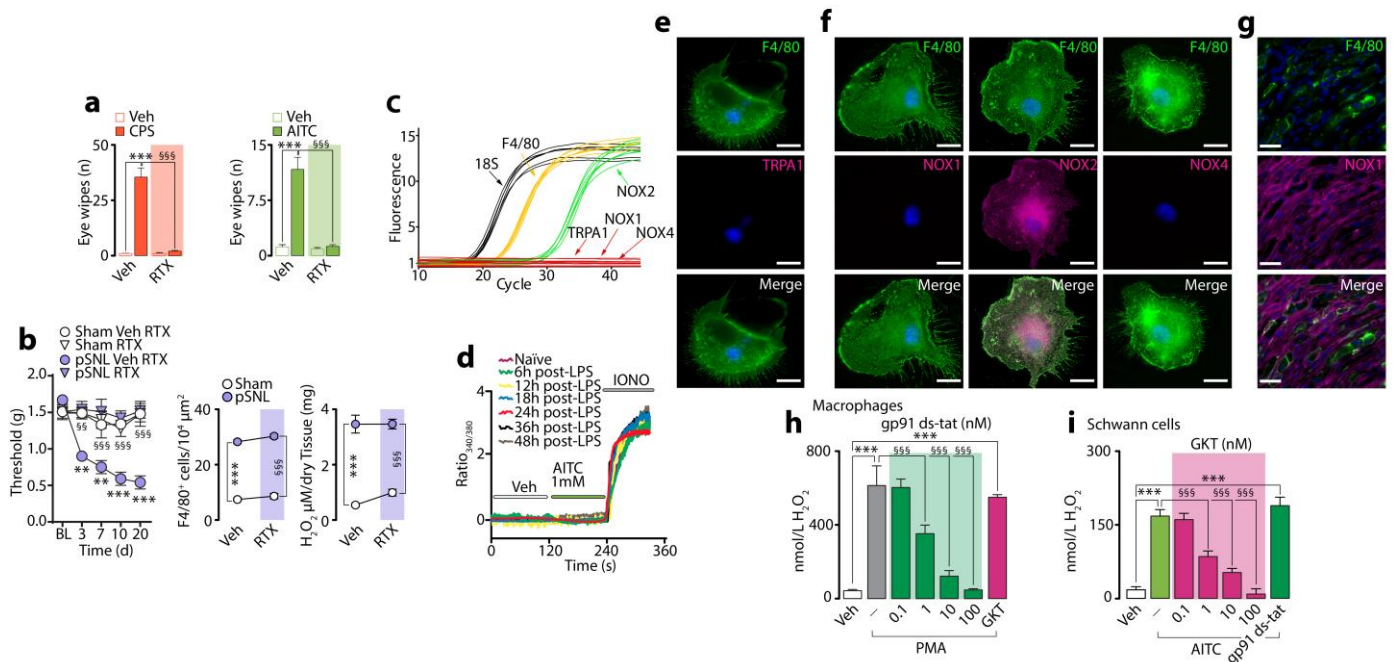

**Supplementary Figure 5. Nerve fibers and macrophages do not generate the TRPA1-dependent oxidative stress.** (a,b) Number of eye wipes to capsaicin (CPS, 1 nmol/5  $\mu$ l) or AITC (10 nmol/5  $\mu$ l), mechanical allodynia and number of F4/80<sup>+</sup> cells and H<sub>2</sub>O<sub>2</sub> content in the sciatic nerve of sham/pSNL C57BL/6 mice after treatment with resiniferatoxin (RTX, 50  $\mu$ g/kg, subcutaneous) or its vehicle (veh, isotonic saline) (n=6, \*\*\*P<0.001 CPS, AITC vs. veh (a), \*\*P<0.01 and \*\*\*P<0.001 pSNL veh RTX vs. Sham veh RTX (b); §§§P<0.001 CPS RTX vs. CPS veh RTX (a), §§P<0.01 and §§§P<0.001 pSNL RTX vs. pSNL veh RTX (b); one-way ANOVA followed by Bonferroni post hoc analyses and two-way ANOVA followed by Bonferroni post hoc analyses). (c) Representative real-time PCR plot for 18S, F4/80, TRPA1, NOX1, NOX2 and NOX4 in mouse peritoneal macrophages in culture (n=3 replicates from 2 independent experiments). (d), Typical traces of calcium response to AITC (1 mM) in naïve or lipopolysaccharide (LPS)-activated peritoneal macrophages. (e) Representative images of F4/80<sup>+</sup> and TRPA1 staining in peritoneal macrophages in culture (Scale bars: 100  $\mu$ m). (f) Representative images of NOX1, NOX2 and NOX4 and F4/80 staining in

peritoneal macrophages in culture (Scale bars: 10  $\mu\text{m}$ ). **(g)** Representative images of NOX1 and F4/80 staining in sciatic nerve of pSNL C57BL/6 mice. (Scale bars: 10  $\mu\text{m}$ ). **(h)**  $\text{H}_2\text{O}_2$  release from cultured peritoneal macrophages by phorbol myristate acetate (PMA, 20 nM) in the presence of different concentrations of gp91ds-tat (NOX2 selective inhibitor, 0.1-100 nM) or GKT (mixed NOX1/NOX4 inhibitor, 100 nM) (n=8 replicates from 3 independent experiments, \*\*\* $P < 0.001$  PMA vs. veh; §§§ $P < 0.001$  PMA gp91ds-tat vs. PMA veh; one-way ANOVA followed by Bonferroni post hoc analyses). **(i)**  $\text{H}_2\text{O}_2$  release from cultured mouse Schwann cells by AITC (100  $\mu\text{M}$ ) in the presence GKT (0.1-100 nM) or gp91ds-tat (100 nM) (n=8 replicates from 3 independent experiments, \*\*\* $P < 0.001$  AITC vs. veh; §§§ $P < 0.001$  AITC GKT vs. AITC veh; one-way ANOVA followed by Bonferroni post hoc analyses). Data are represented as mean $\pm$ s.e.m.

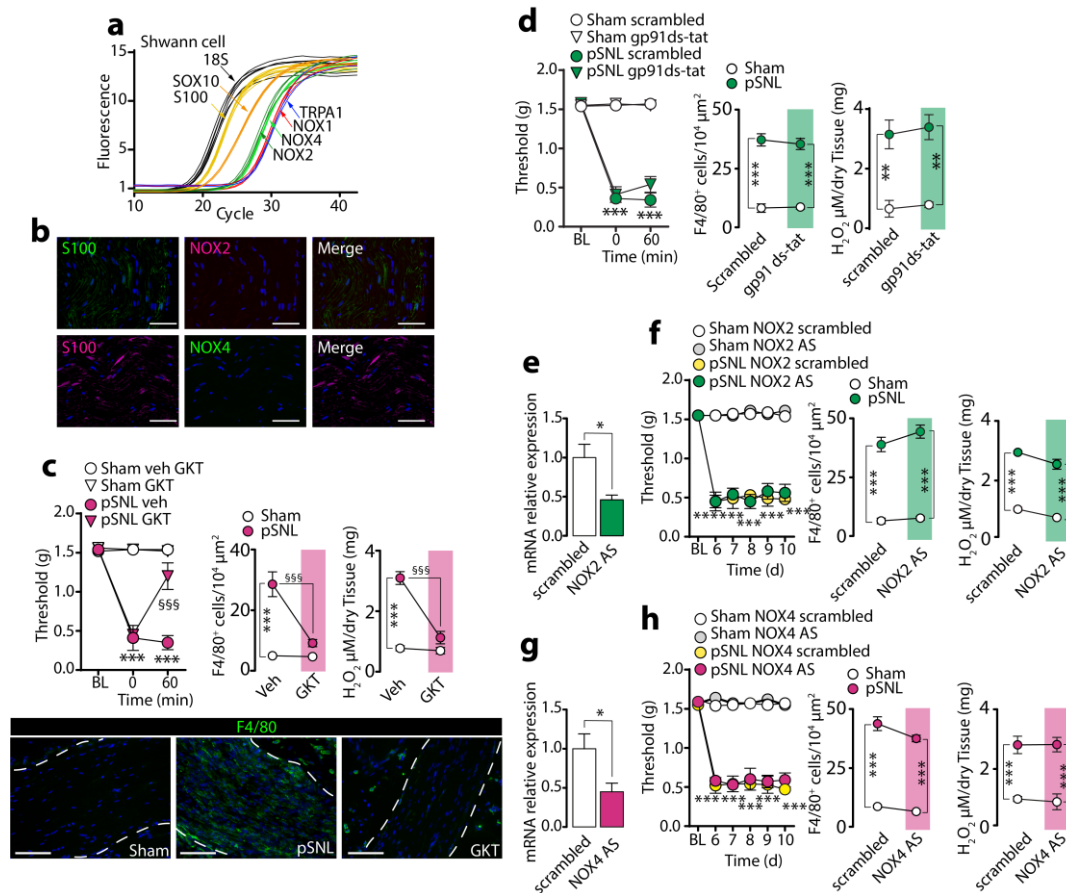

**Supplementary Figure 6. NOX1, but not NOX2 or NOX4, inhibition attenuates pSNL-evoked allodynia and neuroinflammation.** (a) Representative real-time PCR plot for 18S, S100, TRPA1, NOX1, NOX2 and NOX4 in cultured Schwann cells (n=3 replicates from 2 independent experiments). (b) Representative images of S100, NOX2 and NOX4 staining in sciatic nerve of C57BL/6 mice. (Scale bars: 50  $\mu$ m). (c) Mechanical allodynia, representative images and number of F4/80<sup>+</sup> cells, and H<sub>2</sub>O<sub>2</sub> content in sham/pSNL C57BL/6 mice after the NOX1/NOX4 inhibitor, GKT137831 (GKT, 60 mg/kg, i.p.) or vehicle (veh, 4% DMSO 4% tween 80 in isotonic saline) (n=6, \*\*\*P<0.001 pSNL veh, vs. sham veh; §§§P<0.001 pSNL GKT vs. pSNL veh; two-way ANOVA followed by Bonferroni post hoc analyses and one-way ANOVA followed by Bonferroni post hoc analyses. (Scale bars: 50  $\mu$ m). (d) Mechanical allodynia, number of F4/80<sup>+</sup> cells, and H<sub>2</sub>O<sub>2</sub> content in sham/pSNL C57BL/6 mice after the NOX2 inhibitor,



gp91ds-tat (10 mg/kg, i.p.) or vehicle (scrambled) (n=6, \*\*\*P<0.001 pSNL scrambled, vs. sham scrambled; two-way ANOVA followed by Bonferroni post hoc analyses and one-way ANOVA followed by Bonferroni post hoc analyses); **(e,g)** NOX2 and NOX4 mRNA relative expression in sciatic nerve of C57BL/6 mice after perineural NOX2 and NOX4 AS-ODN or scrambled (all, 10 nmol/10  $\mu$ l) (n=3 replicates from 2 independent experiments, \*P<0.05 AS-ODN vs. scrambled, MM-ODN; unpaired two-tailed Student's t-test). **(f,h)** Mechanical allodynia, number of F4/80<sup>+</sup> cells, and H<sub>2</sub>O<sub>2</sub> content in sham/pSNL C57BL/6 mice after perineural NOX2 and NOX4 AS-ODN or scrambled and MM-ODN (all, 10 nmol/10  $\mu$ l) (n=6, \*\*\*P<0.001 pSNL scrambled, pSNL AS-ODN vs. sham scrambled, sham MM-ODN; two-way ANOVA followed by Bonferroni post hoc analyses and one-way ANOVA followed by Bonferroni post hoc analyses). Data are represented as mean $\pm$ s.e.m.

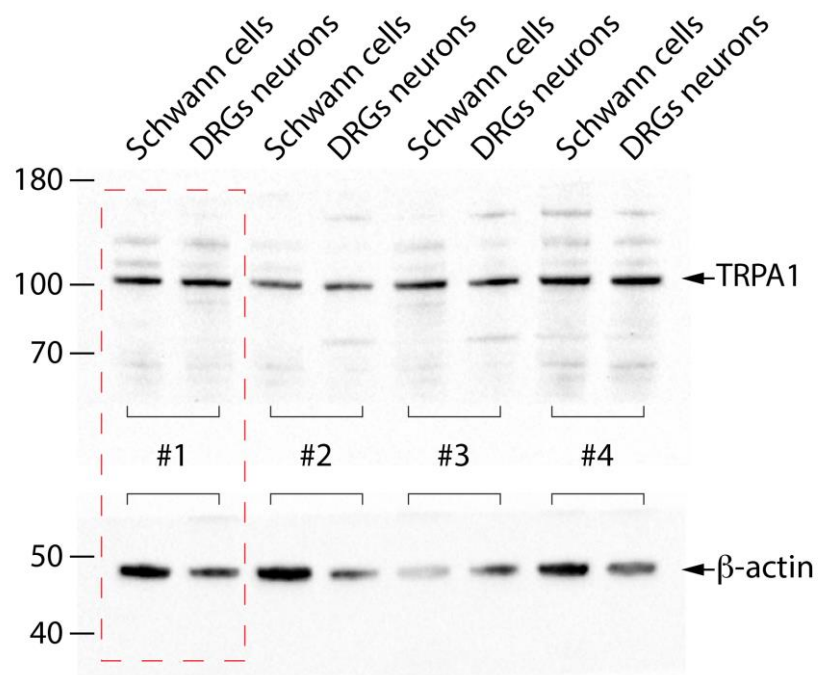

**Supplementary Figure 7. The uncropped scan of the blot.** The blot area within dashed line box is shown in the figure 3g. Samples have been obtained from 4 different mice.
